# Supplementary material for: Prominent astrocytic alpha-synuclein pathology with unique post-translational modification signatures unveiled across Lewy body disorders
Source: PubMed Central journal article supplement (PMC9652889; doi:10.1186/s40478-022-01468-8), 2022-11-12
Supplement: 40478_2022_1468_MOESM1_ESM.pdf [file 40478_2022_1468_MOESM1_ESM.pdf]

**Suppl. Table 1:** The primary and secondary antibodies included in this study.

| primary antibodies        |                   |                       |                          |                           |                  |                  |                 |
|---------------------------|-------------------|-----------------------|--------------------------|---------------------------|------------------|------------------|-----------------|
| antibody                  | epitope           | species/<br>clonality | company /<br>catalogue # | IHC:<br>antigen retrieval | IHC:<br>dilution | IF:<br>dilution* | SB:<br>dilution |
| LASH-EGTNter              | aSyn 1-20         | rab pc                | na                       | AC+FA                     | 1:15,000         | na               | 1:1,000         |
| LASH-BL 34-45             | aSyn 34-45        | mus mc                | Biolegend #849101        | FA                        | 1:30,000         | 1:10,000         | na              |
| LASH-BL 80-96             | aSyn 80-96        | mus mc                | Biolegend #848302        | FA                        | 1:20,000         | na               | na              |
| BD SYN-1                  | aSyn 91-99        | mus mc                | BD #BD610787             | FA                        | 1:5,000          | na               | 1:2,000         |
| BL 4B12                   | aSyn 103-108      | mus mc                | Biolegend #807801        | AC+FA                     | 1:100,000        | na               | na              |
| 2F10-E12                  | aSyn 110-115      | mus mc                | na                       | AC+FA                     | 1:10,000         | na               | na              |
| AB 134-138                | aSyn 134-138      | rab pc                | Abcam #ab131508          | AC+FA                     | 1:25,000         | na               | na              |
| LASH-BL pY39              | aSyn pY39         | mus mc                | Biolegend #849201        | AC+FA                     | 1:2,000          | 1:500            | 1:1,000         |
| LASH pS87                 | aSyn pS87         | rab pc                | na                       | FA                        | 1:600            | na               | na              |
| AB pY125                  | aSyn pY125        | rab pc                | Abcam #ab10789           | FA                        | 1:500            | na               | na              |
| AB EP1536Y                | aSyn pS129        | rab mc                | Abcam #ab51253           | AC+FA                     | 1:60,000         | 1:10,000         | na              |
| AB pY133                  | aSyn pY133        | rab pc                | Abcam #ab194910          | AC+FA                     | 1:400            | na               | na              |
| AB pY136                  | aSyn pY136        | rab pc                | Abcam #ab131491          | FA                        | 1:100            | na               | na              |
| LASH-EGT nY39             | aSyn nY39         | rab pc                | na                       | FA                        | 1:1,000          | 1:500            | 1:200           |
| 6A3-E9                    | aSyn-120          | mus mc                | na                       | AC+FA                     | 1:2,500          | na               | na              |
| 5G4                       | 44-57 // agg-aSyn | mus mc                | Merck-Millipore #MABN389 | AC+FA                     | 1:5,000          | na               | na              |
| SYNO4                     | agg-aSyn          | mus mc                | na                       | FA                        | 1:5,000          | na               | na              |
| Merck-MP anti-GFAP        | GFAP              | ck pc                 | Merck-Millipore #AB5541  | na                        | na               | 1:500            | na              |
| Merck-MP EP79 anti-NF     | NF                | rab mc                | Merck-Millipore #302R-1  | na                        | na               | 1:500            | na              |
| AB anti-Iba1              | Iba1              | goat pc               | Abcam #ab5076            | na                        | na               | 1:80             | na              |
| Merck-MP anti-MBP         | MBP               | rab pc                | Merck-Millipore #AB5864  | na                        | na               | 1:2,000          | na              |
| AB EPR8830 recomb anti-Ub | ubiquitin         | rab mc                | Abcam #ab134953          | na                        | na               | 1:800            | na              |
| Proteintech anti-p62      | p62               | rab pc                | Proteintech #18420-1-AP  | na                        | na               | 1:200            | na              |

\*AC+FA pre-treatment was applied for IF studies for all antibodies.

| secondary antibodies       |          |                        |             |             |
|----------------------------|----------|------------------------|-------------|-------------|
| antibody                   | dilution | company                | catalogue # | application |
| donkey anti-chicken 488    | 1:400    | Jackson ImmunoResearch | 703-545-155 | IF          |
| goat anti-chicken 568      | 1:400    | ThermoFisher           | A-11041     | IF          |
| donkey anti-goat 488       | 1:1,000  | ThermoFisher           | A-11055     | IF          |
| donkey anti-rabbit 568     | 1:1,000  | ThermoFisher           | A-10042     | IF          |
| donkey anti-mouse 568      | 1:1,000  | ThermoFisher           | A-10037     | IF          |
| donkey anti-mouse 647      | 1:1,000  | ThermoFisher           | A-31571     | IF          |
| IRDye goat anti-mouse 680  | 1:20,000 | Li-Cor                 | 926-68070   | SB          |
| IRDye goat anti-rabbit 800 | 1:20,000 | Li-Cor                 | 926-32211   | SB          |

AC = autoclave; agg-aSyn = aggregated alpha-synucleina; aSyn = alpha-synuclein; FA = formic acid; GFAP = glial fibrillary acidic protein; Iba1 = ionised calcium binding adaptor protein 1; IF = immunofluorescence; IHC = immunohistochemistry; MBP = myelin basic protein; mc = monoclonal; mus = mouse; na = not applicable; NF = neurofilament; pc = polyclonal; rab = rabbit; SB = slot blot
