# Supplementary material for: Prominent astrocytic alpha-synuclein pathology with unique post-translational modification signatures unveiled across Lewy body disorders
Source: PubMed Central journal article supplement (PMC9652889; doi:10.1186/s40478-022-01468-8), 2022-11-12

**SUPPLEMENTARY FIGURE 1**

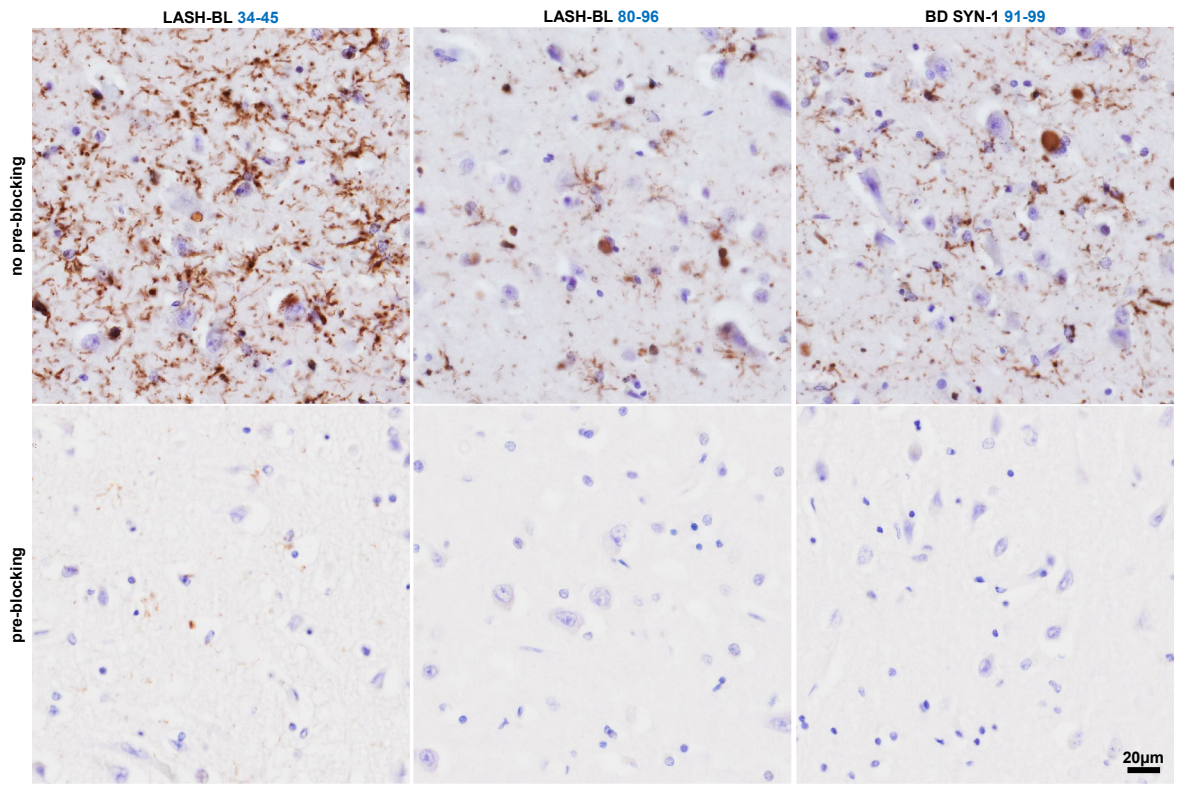

SUPPLEMENTARY FIGURE 2

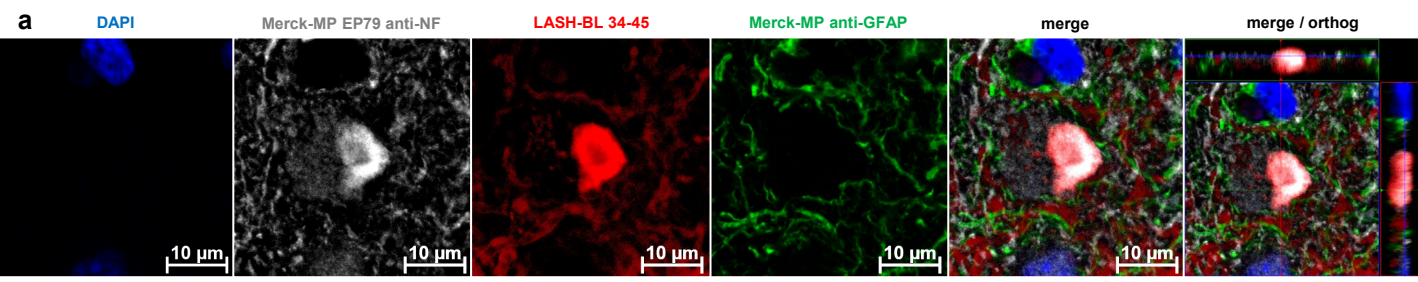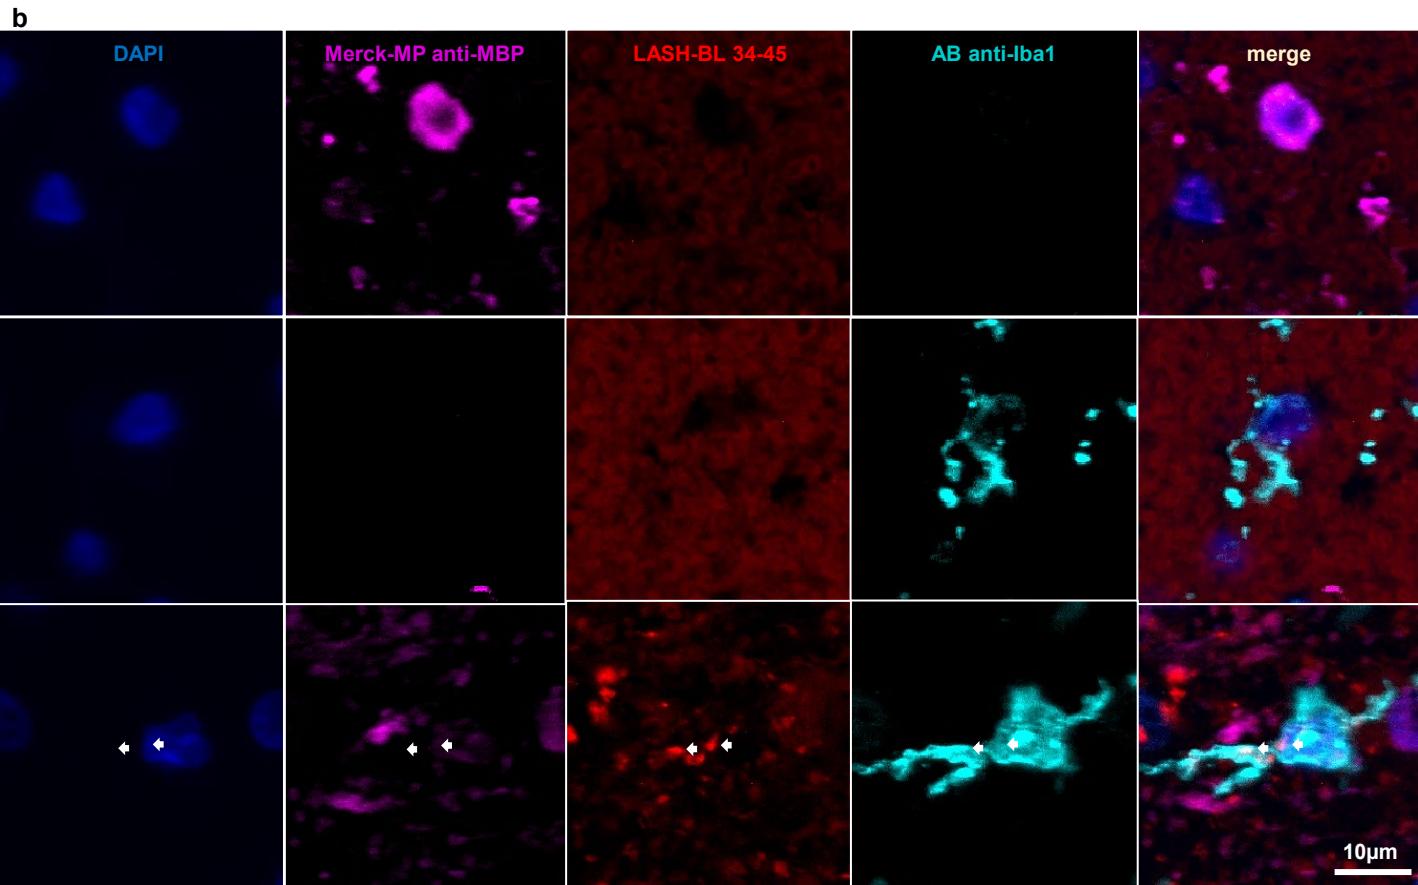

**SUPPLEMENTARY FIGURE 3**

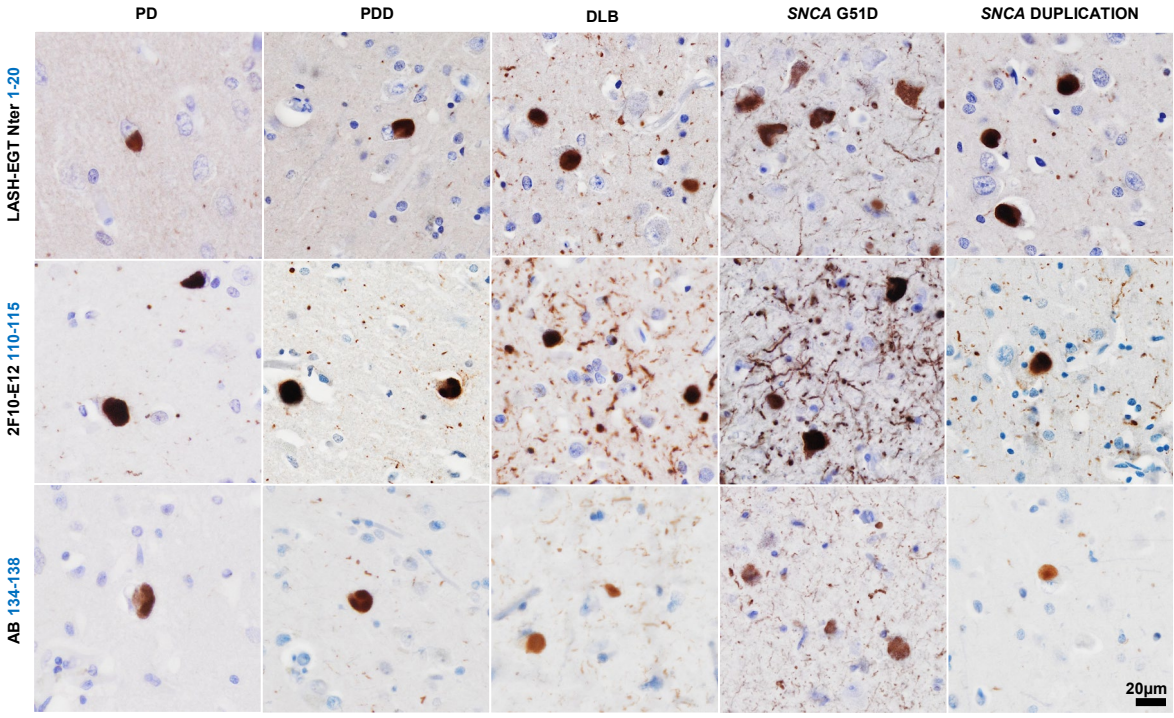

SUPPLEMENTARY FIGURE 4

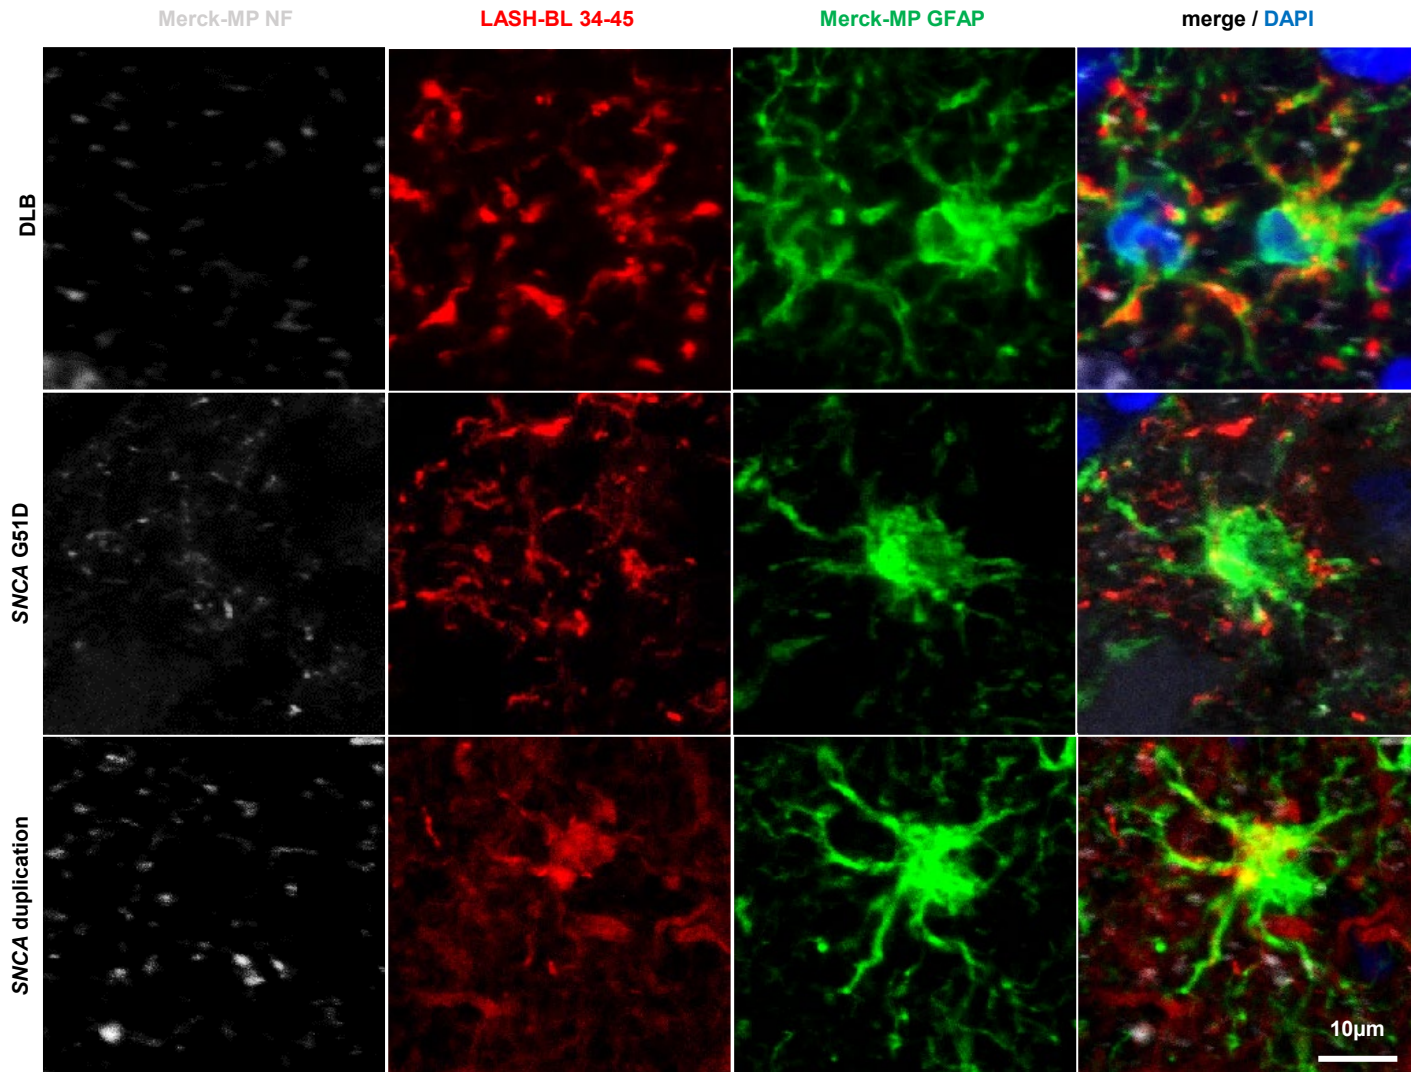

# SUPPLEMENTARY FIGURE 5

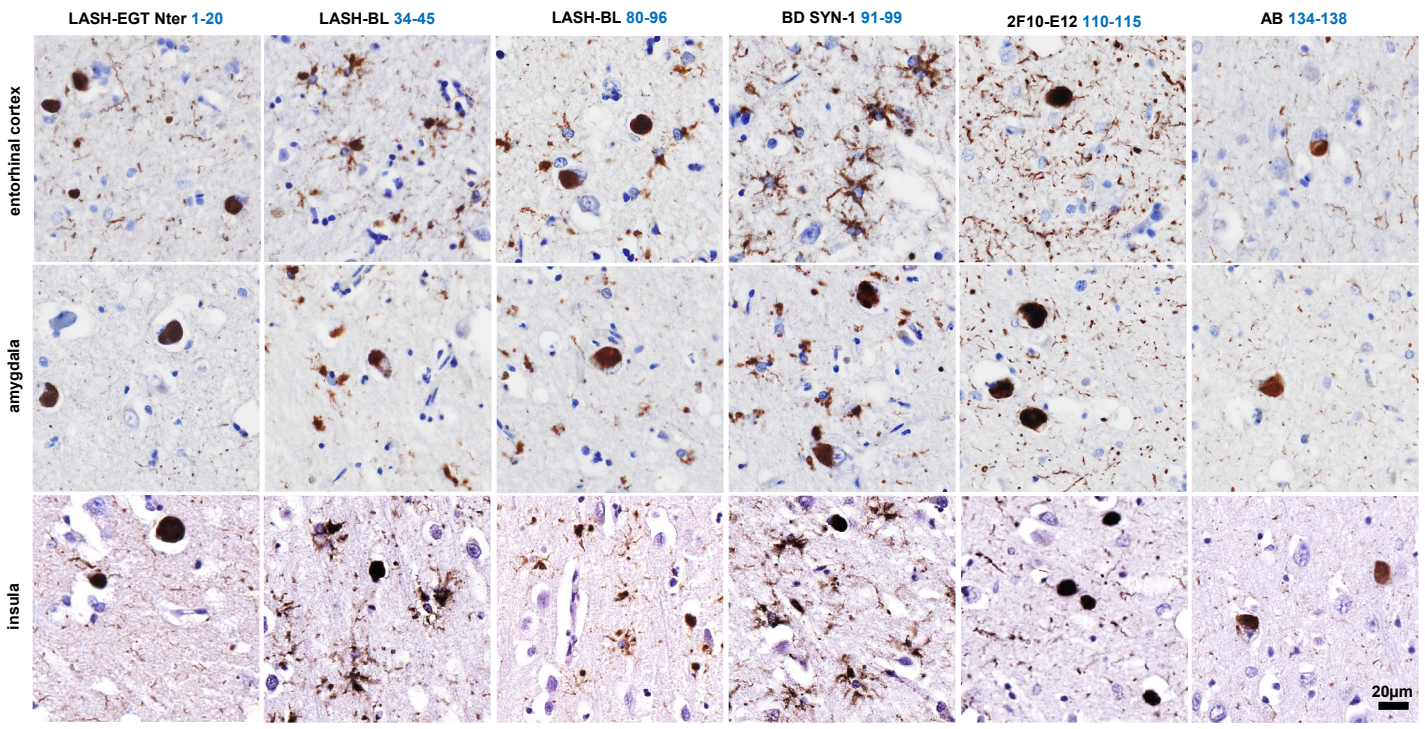

Supplement: 40478_2022_1468_MOESM2_ESM.pdf [file 40478_2022_1468_MOESM2_ESM.pdf]
